# Supplementary material for: Combination of Machine Learning and Analytical Correlations for Establishing Quantitative Compliance between the Trolox Equivalent Antioxidant Capacity Values Obtained via Electron Paramagnetic Resonance and Ultraviolet–Visible Spectroscopies
Source: MDPI journal article supplement (doi:10.3390/ijms231911743), 2022-10-03
Supplement: s1 [file s1]

## Supplementary Information

Combination of machine learning and analytical correlations for establishing quantitative compliance between the Trolox equivalent antioxidant capacity values obtained with two independent techniques

Eugene B. Postnikov\*, Mariola Bartoszek\*\*, Justyna Polak\*\*,

Mirosław Chorazewski\*\*\*

\*Department of Theoretical Physics, Kursk State University, Radishcheva 33,  
305000 Kursk, Russia; postnikov@kursksu.ru

\*\*Faculty of Science and Technology, Institute of Chemistry, University of Silesia,  
Szkołna 9, 40-006 Katowice, Poland

\*\*\*Faculty of Science and Technology, Institute of Chemistry, University of Silesia,  
Szkołna 9, 40-006 Katowice, Poland; mirosław.chorazewski@us.edu.pl

### Determination of antioxidant capacity by the EPR spectroscopy

Antioxidant capacity was determined using the method described previously. (15) Electron paramagnetic resonance spectra were obtained with a Bruker EMX EPR spectrometer (Bruker-Biospin, Germany) operating at the X-band frequency at room temperature. The typical instrument parameters were: central field, 3480 G; modulation amplitude, 2.0 G; time constant, 40.96; gain,  $1 \cdot 10^4$  G; microwave power, 20.12 mW. The regression equation for the linear relationship between the percent inhibition of EPR signal intensity and the mol number of trolox was assessed as:  $y = 1547.8x + 4.7$ , where:  $y$  is the inhibition [%] and  $x$  is the volume of the sample [mL]. This equation was used to calculate the antioxidant activity of the studied samples in  $\mu\text{mol}$  trolox per 100 mL of the studied samples.

A typical reaction mixture contained 1 mL of 200  $\mu\text{mol/L}$  DPPH• solution in ethanol together with 0.0003 mL to 0.380 mL of sample, depending on the manifested antioxidant properties. For all samples, regression equation of the linear relationship between the percent inhibition (% $I$ ) of the EPR signal intensity and the volume of sample ( $V$ ) was determined. Based on this equation the % $I$  corresponding to 100 mL of the studied sample was calculated. Then, from the standard curve obtained for trolox, the antioxidant activity given in  $\mu\text{mol}$  trolox per 100 mL of sample was defined. The data presented here are the result of three trials.

### Determination of antioxidant capacity by UV-vis spectroscopy

TEAC<sub>UV-vis</sub> was determined using the DPPH method. (15) UV-vis spectrophotometric measurements were performed at 515 nm using Lambda Bio 40 spectrophotometer (Perkin Elmer, USA). On

increasing the concentration of trolox, the intensity of the corresponding value of absorbance decreased and consequently, the percent inhibition (%I) increased. The regression equation of the linear relationship of the percent inhibition of absorbance to mol number of trolox was used to calculate the antioxidation activity of the studied samples in  $\mu\text{mol}$  trolox /100 mL of the studied sample. The regression equation for the linear relationship between the percent inhibition of absorbance and the mol number of trolox was assessed as:  $y = 1491x + 0.5$ , where:  $y$  is the inhibition [%] and  $x$  is the volume of the sample [mL]. This equation was used to calculate the antioxidant activity in  $\mu\text{mol}$  trolox per 100 mL of the studied samples ( $\mu\text{mol TE}/100 \text{ mL}$ ).

The percent inhibition of the decrease in absorption at 515 nm calculated according to the following equation:  $\% \text{ Inhibition} = [(A_0 - A)/A_0] * 100\%$ , where  $A_0$  is the absorbance of DPPH• (control sample), and  $A$  is the absorbance of DPPH• with a sample.

A typical reaction mixture contained 3 mL of the 200  $\mu\text{mol/L}$  DPPH• solution in ethanol together with 0.0009 mL to 1.140 mL of wine. For all samples regression equation of linear relationship of the percent inhibition (%I) of the absorbance to the volume of sample ( $V$ ) was determined. On the basis of this equation % I corresponding to 100 mL of the studied sample was calculated. Then from the standard curve the antioxidant activity  $\mu\text{mol}$  Trolox per 100 mL of sample ( $\mu\text{mol TE}/100 \text{ mL}$ ) was defined. The presented data are the means of three determinations.

#### **Determination of Total Phenolic Content**

The total phenolic content (TPC) was determined with Folin-Ciocalteu method using gallic acid as the standard. This method measures the total available hydroxyl groups. At the reaction pH, phenols in the sample are present in the form of the phenolate ion, which can reduce the Folin–Ciocalteu reagent. The absorbance was monitored at 765 nm using Lambda Bio 40 spectrophotometer. The concentration of the total phenolics was calculated as mg of gallic acid equivalent by using an equation obtained from gallic acid calibration curve and the results were expressed as mg gallic acid per litre of wine (mg GAE/L). The data presented here are the result of three trials.

#### **Determination of Color Intensity and Tint**

Color intensity ( $CI$ ) was measured using Lambda Bio 40 spectrophotometer and calculated as the sum of absorbances at 420, 520 and 620 nm.

Tint was measured using Lambda Bio 40 spectrophotometer and calculated as the ratio of absorbances at 520 and 420 nm.

**Table S1.** An overview of the wine samples investigated. Antioxidant capacity measured by EPR and UV-vis spectroscopy, total phenolic content and color intensity of tested wines.

| No | Sample                    | Origin   | Color | Wine type | Year | Content of alcohol [%] | TEAC <sub>EPR</sub> [μmol TE/100 mL] | TEAC <sub>UV-vis</sub> [μmol TE/100 mL] | TPC [mgGA/L] | CI    | Tint |
|----|---------------------------|----------|-------|-----------|------|------------------------|--------------------------------------|-----------------------------------------|--------------|-------|------|
| 1  | Chianti                   | Italy    | red   | dry       | 2014 | 12.5                   | 1127.04                              | 958.14                                  | 1523.08      | 8.05  | 1.03 |
| 2  | Maree D'ione Nero D'avolo | Italy    | red   | dry       | 2013 | 13                     | 1646.71                              | 1534.40                                 | 2575         | 7.36  | 0.89 |
| 3  | Finca La Casona           | Spain    | red   | dry       | 2014 | 12                     | 778.03                               | 634.72                                  | 1532.69      | 7.82  | 0.96 |
| 4  | Cabernet Sauvignon        | France   | red   | dry       | 2014 | 12.5                   | 808.32                               | 667.56                                  | 1888.46      | 8.49  | 0.97 |
| 5  | Merlot                    | France   | red   | dry       | 2013 | 12.5                   | 827.33                               | 716.08                                  | 1176.92      | 9.03  | 1.11 |
| 6  | Dornfelder                | Germany  | red   | dry       | 2012 | 12.5                   | 373.56                               | 350.97                                  | 1119.23      | 8.23  | 0.83 |
| 7  | Merlot Vento              | Italy    | red   | dry       | 2014 | 12                     | 847.51                               | 632.93                                  | 1138.46      | 8.51  | 0.98 |
| 8  | Real Forte                | Portugal | red   | dry       | 2014 | 13.5                   | 694.16                               | 696.54                                  | 2090.38      | 8.72  | 0.86 |
| 9  | Merlot Terra Tanrga       | Bulgaria | red   | dry       | 2013 | 13                     | 707.51                               | 560.09                                  | 1436.54      | 10.16 | 1.03 |
| 10 | Coteaux Bourgignons       | France   | red   | dry       | 2014 | 12.5                   | 771.35                               | 575.91                                  | 1436.54      | 8.42  | 0.81 |
| 11 | Rioja Joven               | Spain    | red   | dry       | 2014 | 13.5                   | 716.50                               | 450.10                                  | 1225         | 7.84  | 0.84 |
| 12 | Kadarka                   | Bulgaria | red   | semisweet | 2015 | 11.5                   | 314.58                               | 262.19                                  | 638.46       | 4.90  | 1.08 |
| 13 | El Sol                    | Spain    | red   | semisweet | 2014 | 10.5                   | 577.62                               | 585.83                                  | 1128.85      | 6.96  | 0.95 |

Abbreviations: TEAC<sub>EPR</sub> - Trolox equivalent antioxidant capacity determined by EPR spectroscopy, TEAC<sub>UV-vis</sub> - Trolox equivalent antioxidant capacity determined by UV-vis spectroscopy, TPC – Total Phenolic Content, CI – color intensity of wine ( $CI = A_{420} + A_{520} + A_{620}$  (where  $A_n$  represents the absorbance at wavelength  $n$ ))

|    |                                   |           |       |           |      |      |        |        |         |      |          |
|----|-----------------------------------|-----------|-------|-----------|------|------|--------|--------|---------|------|----------|
| 14 | Mogen David,<br>Concord           | USA       | red   | semisweet | 2014 | 11   | 228.73 | 206.96 | 773.08  | 5.34 | 1.4<br>0 |
| 15 | Jacob's Greek<br>Merlot Shinaz    | Australia | red   | semisweet | 2014 | 11.7 | 774.68 | 490.32 | 1715.38 | 8.01 | 1.5<br>2 |
| 16 | Carlo Rossi                       | USA       | red   | sweet     | 2013 | 9.5  | 448.73 | 379.86 | 1417.31 | 7.81 | 1.1<br>4 |
| 17 | Schoppin                          | Bulgaria  | red   | sweet     | 2015 | 12   | 236.70 | 267.48 | 1234.62 | 6.20 | 1.2<br>4 |
| 18 | Cotes De Provence                 | France    | rose  | dry       | 2014 | 12.5 | 74.17  | 44.36  | 330.77  | 0.47 | 1.6<br>3 |
| 19 | J. C. Beauvoir                    | France    | rose  | dry       | 2012 | 12.5 | 103.89 | 46.89  | 330.77  | 0.91 | 1.3<br>7 |
| 20 | Rioja Rosado                      | Spain     | rose  | dry       | 2013 | 12.5 | 114.37 | 58.18  | 321.15  | 0.72 | 0.8<br>8 |
| 21 | Cotes De Provence                 | France    | rose  | dry       | 2014 | 12.5 | 81.98  | 52.83  | 244.23  | 0.21 | 1.5<br>2 |
| 22 | Carlo Rossi                       | USA       | rose  | semidry   | 2014 | 9.5  | 58.43  | 44.28  | 359.62  | 0.40 | 1.8<br>9 |
| 23 | Monte Da Serra                    | Portugal  | rose  | semidry   | 2013 | 12.5 | 77.37  | 69.23  | 321.15  | 0.88 | 1.6<br>3 |
| 24 | Kadarka                           | Bulgaria  | rose  | semisweet | 2015 | 11   | 70.96  | 39.77  | 263.46  | 0.62 | 0.9<br>9 |
| 25 | El Sol                            | USA       | rose  | semisweet | 2014 | 10.5 | 99.13  | 69.74  | 503.85  | 0.87 | 0.8<br>5 |
| 26 | Varna 1444                        | Bulgaria  | rose  | semisweet | 2012 | 11   | 141.88 | 99.75  | 340.38  | 2.14 | 1.4<br>1 |
| 27 | Beauvillon                        | France    | rose  | semisweet | 2014 | 11.5 | 70.18  | 74.52  | 446.15  | 0.55 | 1.7<br>6 |
| 28 | Portugiesischer                   | Portugal  | rose  | semisweet | 2014 | 9.5  | 195.34 | 137.90 | 648.08  | 1.34 | 2.8<br>9 |
| 29 | Dornfelder Rose<br>Mosel Feinherb | Germany   | rose  | semisweet | 2015 | 10.5 | 109.24 | 74.08  | 340.38  | 1.33 | 3.6<br>1 |
| 30 | Bacchus                           | Poland    | white | dry       | 2013 | 10   | 56.45  | 37.84  | 282.69  | 0.65 | 4.5<br>5 |

|    |                                |           |       |           |      |      |        |        |        |      |      |
|----|--------------------------------|-----------|-------|-----------|------|------|--------|--------|--------|------|------|
| 31 | Chardonnay                     | Poland    | white | dry       | 2014 | 12   | 37.22  | 31.67  | 196.15 | 0.32 | 4.33 |
| 32 | Yellow Tail Chardonnay         | Australia | white | dry       | 2010 | 13   | 32.93  | 33.90  | 215.38 | 0.61 | 3.69 |
| 33 | Real Forte                     | Portugal  | white | dry       | 2014 | 13   | 81.80  | 84.92  | 369.23 | 0.22 | 3.97 |
| 34 | Felix Rocha                    | Portugal  | white | dry       | 2014 | 12   | 54.47  | 36.75  | 321.15 | 0.13 | 3.81 |
| 35 | Pinot Bianco                   | Italy     | white | dry       | 2014 | 12   | 58.30  | 36.77  | 148.08 | 0.09 | 3.16 |
| 36 | L`Or Marine, Cotes De Gascogne | France    | white | dry       | 2014 | 11.5 | 191.56 | 122.70 | 330.77 | 0.22 | 4.54 |
| 37 | Monte Da Serra                 | Portugal  | white | semidry   | 2015 | 12.5 | 98.42  | 91.05  | 301.92 | 0.20 | 3.00 |
| 38 | Thracian Quest                 | Bulgaria  | white | semidry   | 2015 | 10.5 | 21.10  | 14.68  | 71.15  | 0.08 | 4.03 |
| 39 | Chardonnay Veneto Comera       | Italy     | white | semidry   | 2015 | 12   | 76.75  | 48.56  | 273.08 | 0.11 | 4.20 |
| 40 | Bulgarius                      | Bulgaria  | white | semisweet | 2015 | 11   | 13.04  | 15.35  | 109.62 | 0.08 | 4.50 |
| 41 | Kadarka                        | Bulgaria  | white | semisweet | 2015 | 11   | 20.41  | 24.85  | 128.85 | 0.26 | 1.03 |
| 42 | Peter Mertes                   | Germany   | white | semisweet | 2014 | 9.5  | 89.96  | 82.64  | 253.85 | 0.20 | 0.89 |
| 43 | Fresco                         | Poland    | white | semisweet | 2015 | 10   | 25.14  | 18.04  | 90.38  | 0.08 | 0.96 |
| 44 | Riesling Maybach               | Grmany    | white | semisweet | 2014 | 10   | 80.92  | 75.92  | 369.23 | 0.10 | 0.97 |
